# Supplementary material for: X-ray structure and enzymatic study of a bacterial NADPH oxidase highlight the activation mechanism of eukaryotic NOX
Source: eLife. 2024 Apr 19;13:RP93759. doi: 10.7554/eLife.93759 (PMC11031084; doi:10.7554/eLife.93759)
Supplement: Table 4—source data 2. [file elife-93759-table4-data2.pdf]

|            | $k_{cat}$ (s <sup>-1</sup> ) |              |              |
|------------|------------------------------|--------------|--------------|
|            | <b>SpNOX WT</b>              | <b>Y122A</b> | <b>R126A</b> |
| FAD        | 4,23 ± 0.3                   | 1,92 ± 0.1   | 3,5 ± 0.1    |
| FMN        | 2,46 ± 0.2                   | 1,42 ± 0.1   | 2,5 ± 0.1    |
| Riboflavin | 3,23 ± 0.1                   | 1,31 ± 0.1   | 1,85 ± 0.1   |

**Table 4-source data 2.**  $k_{cat}$  determined as a function of the mutation in the D-loop and the flavin used. These parameters were extracted from data of (Table 4-figure supplement 1).
