# Supplementary material for: X-ray structure and enzymatic study of a bacterial NADPH oxidase highlight the activation mechanism of eukaryotic NOX
Source: eLife journal article supplement (doi:10.7554/elife.93759), 2024-01-23
Supplement: table2-data1 [file elife-93759-table2-data1-v1.pdf]

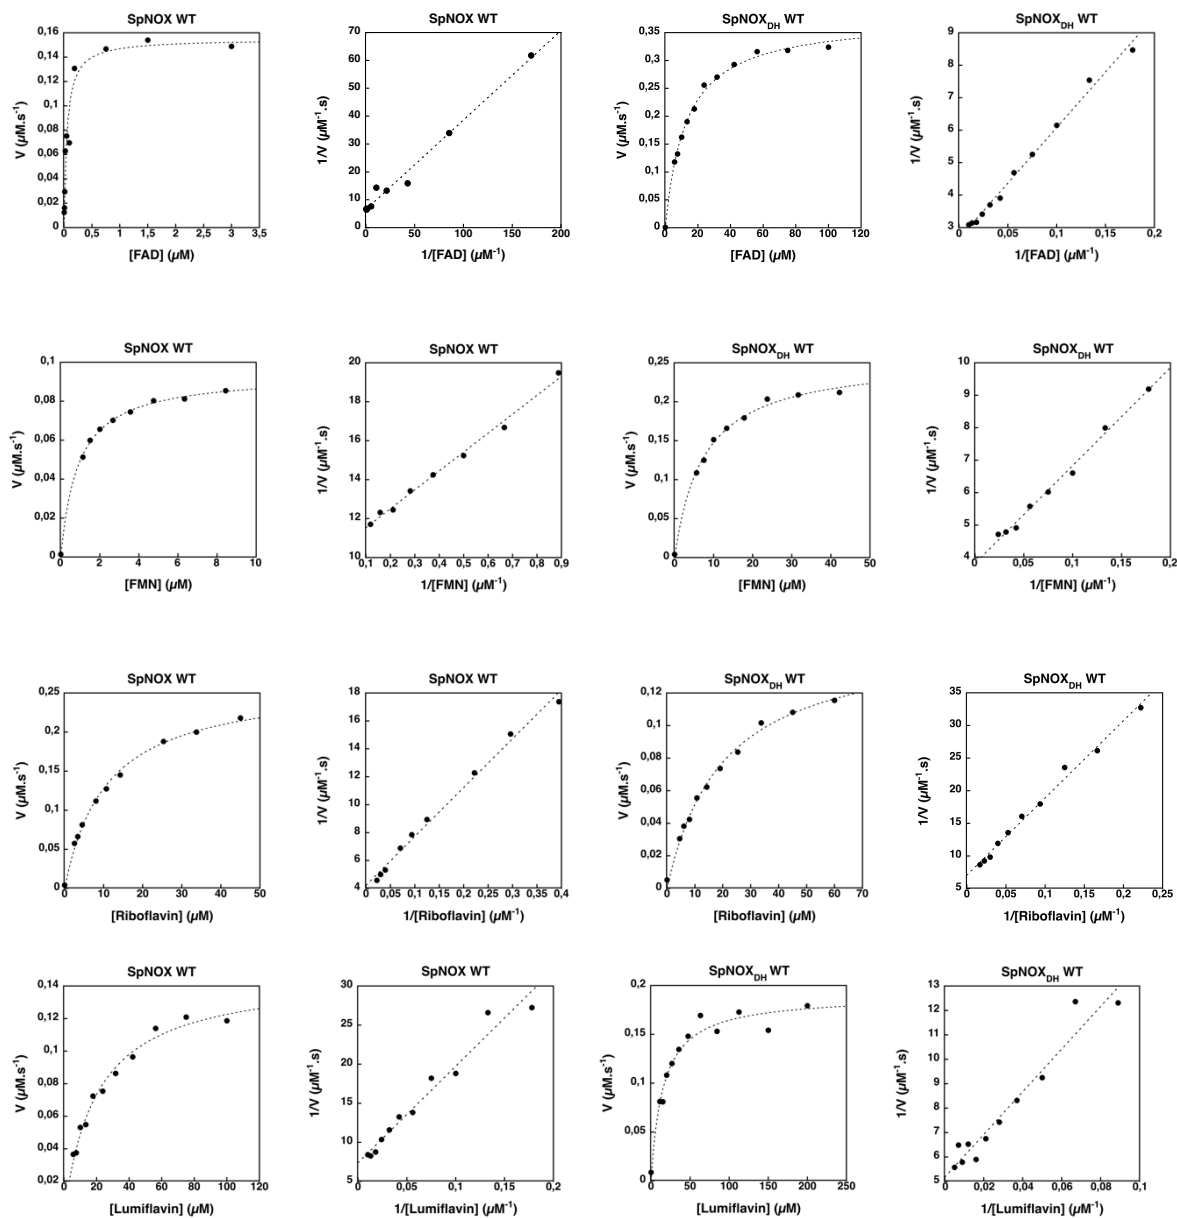

**Table 2-source data 1. Michaelis Menten analysis of SpNOX and SpNOX<sub>DH</sub> as a function of the flavin substrate.** Cytochrome *c* reductase activity was monitored at 550 nm. For all flavin substrates the Michaelis Menten plots and the Lineweaver-Burk plots are presented.  $K_m$  and  $k_{cat}$  extracted from these experiments are presented in Table 2.
