# Supplementary material for: X-ray structure and enzymatic study of a bacterial NADPH oxidase highlight the activation mechanism of eukaryotic NOX
Source: eLife journal article supplement (doi:10.7554/elife.93759), 2024-01-23
Supplement: table4-data1 [file elife-93759-table4-data1-v1.pdf]

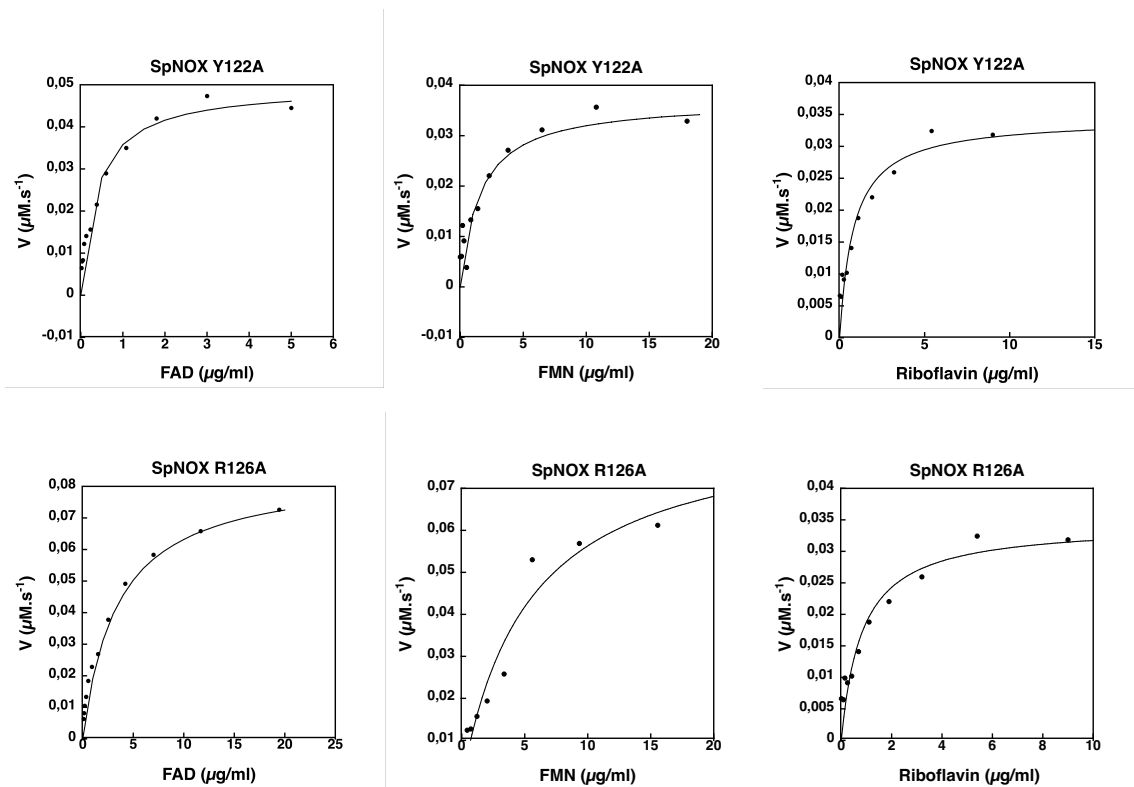

**Table 4-source data 1. Michaelis Menten analysis of SpNOX and SpNOX Y122A and SpNOX R126A as a function of the flavin substrate.** Cytochrome *c* reductase activity was monitored at 550 nm. For all substrates the Michaelis Menten plots are presented.
